# Supplementary material for: Can a heavy trinitromethyl group always result in a higher density?
Source: Royal Society of Chemistry journal article supplement (doi:10.1039/d2cc07077d), 2023-01-01
Supplement: d2cc07077d1.pdf [file d2cc07077d1.pdf]

Supporting Information

for

**Can heavy trinitromethyl group always result in a higher density?**

Ning Ding<sup>+a</sup>, Qi Sun<sup>+a</sup>, Xudong Xu<sup>a</sup>, Yaqiong Li<sup>a</sup>, Chaofeng Zhao<sup>a</sup>, Shenghua Li<sup>\*,a,b</sup>, Siping Pang<sup>\*,a</sup>

<sup>a</sup>School of Materials Science & Engineering, Beijing Institute of Technology, Beijing 100081, China

<sup>b</sup>Yangtz Delta Region Academy of Beijing Institute of Technology, Jiaxing 314019

Corresponding Author E-mail: lishenghua@bit.edu.cn; pangsp@bit.edu.cn

**Table of Contents**

1. General methods
2. Safety precautions
3. Experimental procedures
4. Spectrum analysis
5. Crystal structures
6. Calculation of packing coefficient
7. Heat of formation
8. Noncovalent interaction
9. Thermal stability

## 1. General Methods

All reagents were purchased from Energy Chemical of analytical grade and were used as supplied, if not stated otherwise. The melting points and decomposition temperatures were obtained on a differential scanning calorimeter (Mettler Toledo DSC823e) at a scan rate of 5 °C min<sup>-1</sup> in closed Al containers with a nitrogen flow of 50 mL min<sup>-1</sup>.

## 2. Safety Precautions

All the new pyrazole compounds in this manuscript are powerful explosives, and should be handled with extreme care using the best safety practices.

## 3. Experimental procedures

1-trinitromethyl-4-amino-3,5-dinitropyrazole (**TN-116**): A solution of AT-116<sup>[1]</sup> (0.4 g, 1.75 mmol) in 100% H<sub>2</sub>SO<sub>4</sub> (4 mL) was stirred at 0–5 °C and treated by dropwise addition of 90% HNO<sub>3</sub> (3 ml) and the mixture was stirred for 2 days at room temperature. Separated crude product was filtered off, washed with CF<sub>3</sub>CO<sub>2</sub>H (3 ml), dried over P<sub>2</sub>O<sub>5</sub>. TN-116 (0.28 g, 50%) was isolated as light-yellow crystals by recrystallization from CH<sub>3</sub>CN. T<sub>d</sub>(onset): 113 °C. <sup>1</sup>H NMR (DMSO-d<sub>6</sub>): 7.11 ppm. <sup>13</sup>C NMR (DMSO-d<sub>6</sub>): 150.41, 137.26, 133.26, 124.00 ppm. IR (KBr): ~~(delete)~~ 3250, 1635, 1591, 1536, 1435, 1394, 1353, 1318, 1271, 1175, 1169, 1119, 815 796 cm<sup>-1</sup>. Elemental analysis for C<sub>4</sub>H<sub>2</sub>N<sub>8</sub>O<sub>10</sub>. Calcd: C 14.92; H 0.63 N 34.79 %. Found: C 15.16; H 0.88; N 34.22 %.

## 4. Spectrum Analysis

### 4.1 NMR spectra.

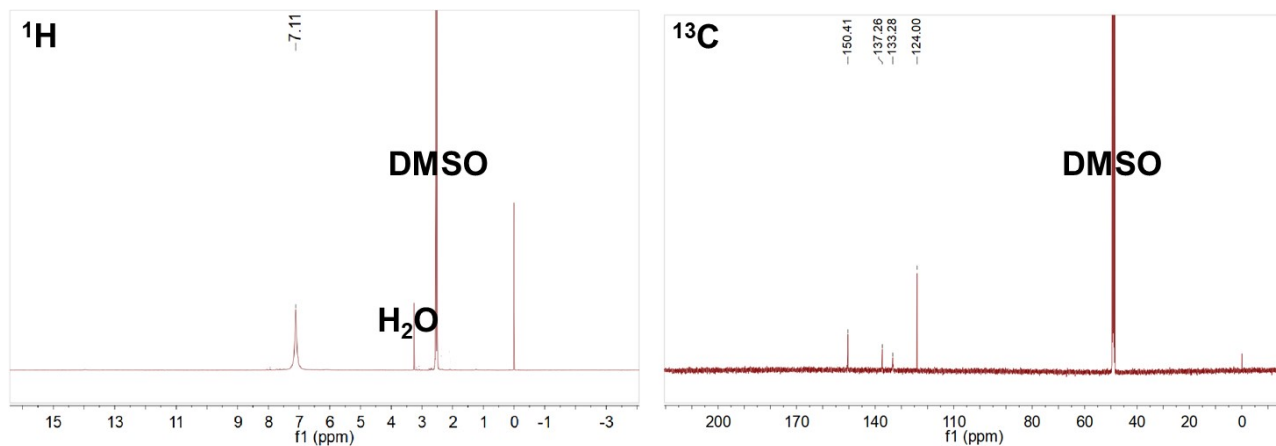

Figure S1. <sup>1</sup>H NMR and <sup>13</sup>C NMR of TN-116 in DMSO-d<sub>6</sub>.

### 4.2 IR Spectrum.

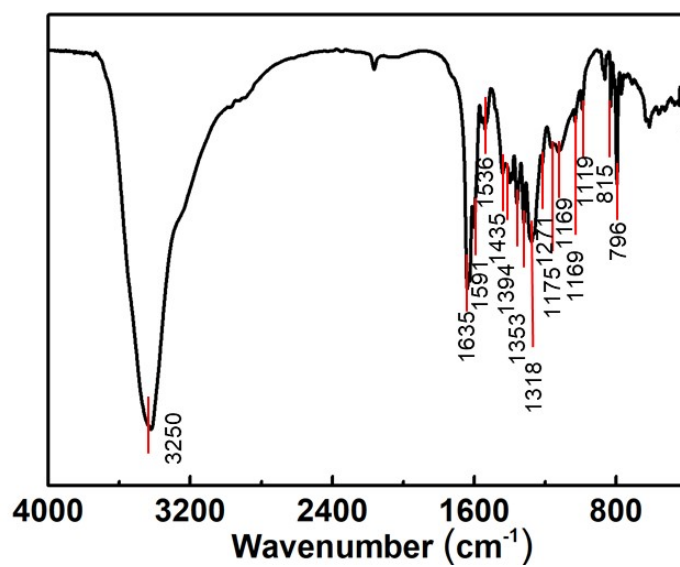

Figure S2. IR spectrum of TN-116.

## 5. Crystal Structures

### 5.1 X-ray crystallography details

A colorless block crystal (**TN-116**) of dimensions 0.20×0.20×0.20 mm<sup>3</sup> was mounted on an Enraf-Nonius CAD4 four-circle diffractometer using graphite-monochromated Mo K $\alpha$  radiation ( $\lambda = 0.71073 \text{ \AA}$ ) at 296 K. Corrections for Lorentz and polarization effects and for absorption ( $\psi$  scan) were applied. The structure was solved by direct methods using SHELXS-97 and refined by full-matrix least-squares calculation on F<sup>2</sup> with SHELXL-97. All non-hydrogen atoms were refined anisotropically. All hydrogen atoms were placed in calculated positions and were assigned fixed isotropic thermal parameters at 1.2 times the equivalent isotropic U of the atoms to which they were attached and allowed to ride on their respective parent atoms. The contributions of these hydrogen atoms were included in the structure-factor calculations.

**Table S1.** Crystallographic data for **TN-116** and **LLM-116**.

| Compound                                 | <b>TN-116</b>                                                | <b>LLM-116</b>                                              |
|------------------------------------------|--------------------------------------------------------------|-------------------------------------------------------------|
| Formula                                  | C <sub>4</sub> H <sub>2</sub> N <sub>8</sub> O <sub>10</sub> | C <sub>3</sub> H <sub>3</sub> N <sub>5</sub> O <sub>4</sub> |
| M <sub>w</sub>                           | 322.14                                                       | 173.10                                                      |
| Crystal system                           | orthorhombic                                                 | Orthorhombic                                                |
| Space group                              | P 21 21 21                                                   | P 21 21 21                                                  |
| a [Å]                                    | 8.033 (3)                                                    | 4.7257(5)                                                   |
| b [Å]                                    | 11.591 (5)                                                   | 4.7312(6)                                                   |
| c [Å]                                    | 12.100 (5)                                                   | 27.063(4)                                                   |
| α[°]                                     | 90                                                           | 90                                                          |
| β[°]                                     | 90                                                           | 90                                                          |
| γ[°]                                     | 90                                                           | 90                                                          |
| V [Å <sup>3</sup> ]                      | 1126.6 (8)                                                   | 605.07(13)                                                  |
| Z                                        | 4                                                            | 4                                                           |
| T [K]                                    | 296                                                          | 294                                                         |
| λ [Å]                                    | 0.71073                                                      | 1.54178                                                     |
| P <sub>calcd</sub> [g cm <sup>-3</sup> ] | 1.899                                                        | 1.900                                                       |
| μ [mm <sup>-1</sup> ]                    | 0.188                                                        | 1.555                                                       |
| F(000)                                   | 648.0                                                        | 352                                                         |
| θ range[°]                               | 2.433-25.025                                                 | 13.45-36.33                                                 |
| Index ranges                             | -9 ≤ h ≤ 8                                                   | -5 ≤ h ≤ 5                                                  |
|                                          | -13 ≤ k ≤ 12                                                 | 0 ≤ k ≤ 5                                                   |
|                                          | -14 ≤ l ≤ 14                                                 | 0 ≤ l ≤ 29                                                  |
| Data/restraints/parameters               | 1972/0/199                                                   | 851/0/111                                                   |
| GOF on F <sup>2</sup>                    | 1.071                                                        | 1.101                                                       |
| R[F <sup>2</sup> > 2σ(F <sup>2</sup> )]  | 0.0439                                                       | 0.0329                                                      |
| wR(F <sup>2</sup> )                      | 0.1017                                                       | 0.0880                                                      |

## 5.2 Bond lengths and angles

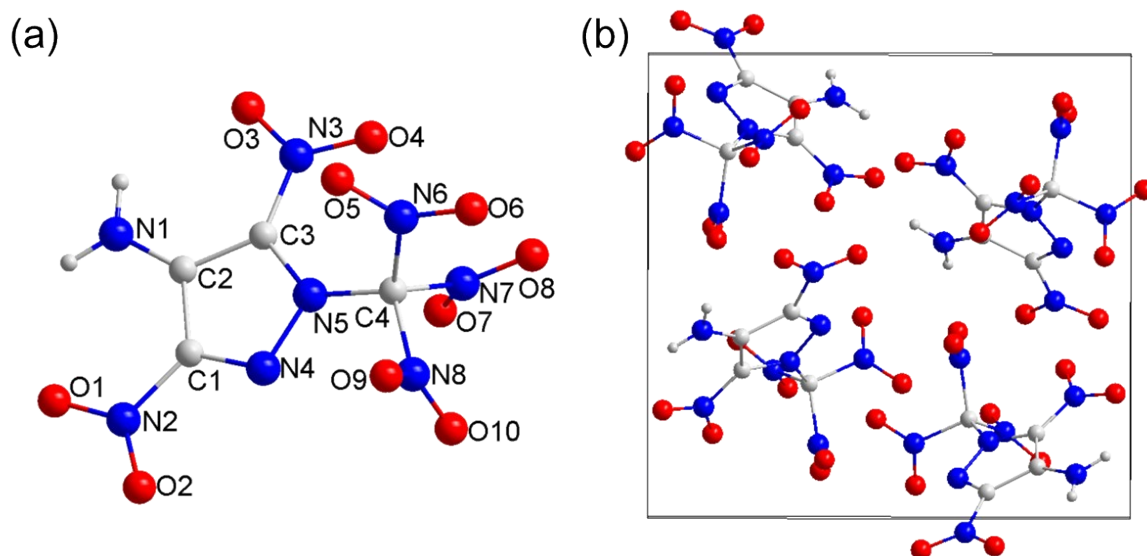

**Figure S3.** (a) Crystal structure of **TN-116**; (b) Packing diagram of **TN-116**.

**Table S2.** Bond lengths (Å) and bond angles (°) for **TN-116**.

| Bond lengths      |                   |                   |
|-------------------|-------------------|-------------------|
| C1 N4 1.317(5)    | C4 N8 1.536(6)    | N3 O4 1.232(5)    |
| C1 C2 1.422(6)    | C4 N6 1.545(6)    | N4 N5 1.358(5)    |
| C1 N2 1.449(6)    | C4 N7 1.551(6)    | N6 O5 1.184(5)    |
| C2 N1 1.332(5)    | N1 H1A 0.8600     | N6 O6 1.206(5)    |
| C2 C3 1.375(6)    | N1 H1B 0.8600     | N7 O7 1.196(5)    |
| C3 N5 1.388(5)    | N2 O2 1.203(5)    | N7 O8 1.208(5)    |
| C3 N3 1.398(6)    | N2 O1 1.225(5)    | N8 O10 1.191(6)   |
| C4 N5 1.400(5)    | N3 O3 1.225(5)    | N8 O9 1.205(6)    |
| Bond angles       |                   |                   |
| N4 C1 C2 114.6(4) | N8 C4 N7 106.6(4) | N4 N5 C3 110.6(3) |
| N4 C1 N2 118.1(4) | N6 C4 N7 111.8(4) | N4 N5 C4 118.1(3) |
| C2 C1 N2 127.2(4) | C2 N1 H1A 120.0   | C3 N5 C4 131.3(4) |
| N1 C2 C3 129.1(4) | C2 N1 H1B 120.0   | O5 N6 O6 126.7(5) |
| N1 C2 C1 129.0(4) | H1A N1 H1B 120.0  | O5 N6 C4 117.2(4) |
| C3 C2 C1 101.8(4) | O2 N2 O1 125.1(4) | O6 N6 C4 115.8(4) |
| C2 C3 N5 108.6(4) | O2 N2 C1 119.1(4) | O7 N7 O8 128.5(5) |

|                     |                   |                    |
|---------------------|-------------------|--------------------|
| C2 C3 N3 128.3(4) . | O1 N2 C1 115.7(4) | O7 N7 C4 114.6(4)  |
| N5 C3 N3 123.1(4) . | O3 N3 O4 124.6(4) | O8 N7 C4 116.9(5)  |
| N5 C4 N8 110.0(3)   | O3 N3 C3 117.0(4) | O10 N8 O9 128.6(5) |
| N5 C4 N6 112.2(4)   | O4 N3 C3 118.4(4) | O10 N8 C4 116.2(5) |
| N8 C4 N6 105.3(4)   | C1 N4 N5 104.3(3) | O9 N8 C4 115.2(4)  |
| N5 C4 N7 110.7(4)   |                   |                    |

## 6. Calculation of packing coefficient

Packing coefficient were calculated using traditional method by using the equation  $PC = \sum V_m / V_c$ , where  $V_m$  is the volume enclosed by a surface with an electronic density of 0.003 a.u., and  $V_c$  is the unit cell volume. However, single-crystal X-ray data of many trinitromethyl compounds and precursors were collected at different temperatures, the direct comparison using existing method would cause large errors, and even the single-crystal data of some compounds were missing, so it is impossible to calculate and compare the packing coefficient. In order to realize the comparison of packing coefficient at the same level, the calculation method of packing coefficient was optimized in this study. The key to optimization lies in how to replace the unknown cell volume ( $V_m$ ) by other known parameters, for which we further derive the existing calculation equations. As the derivation process shown in Figure S1 we found that the packing coefficient can be replaced by  $PC = \rho_c / \rho_M$ , where  $\rho_c$  is the crystal density (this density can be the room temperature crystal density, the density converted from the low temperature crystal density, and the room temperature measured density) and  $\rho_M$  is calculated single molecular density.

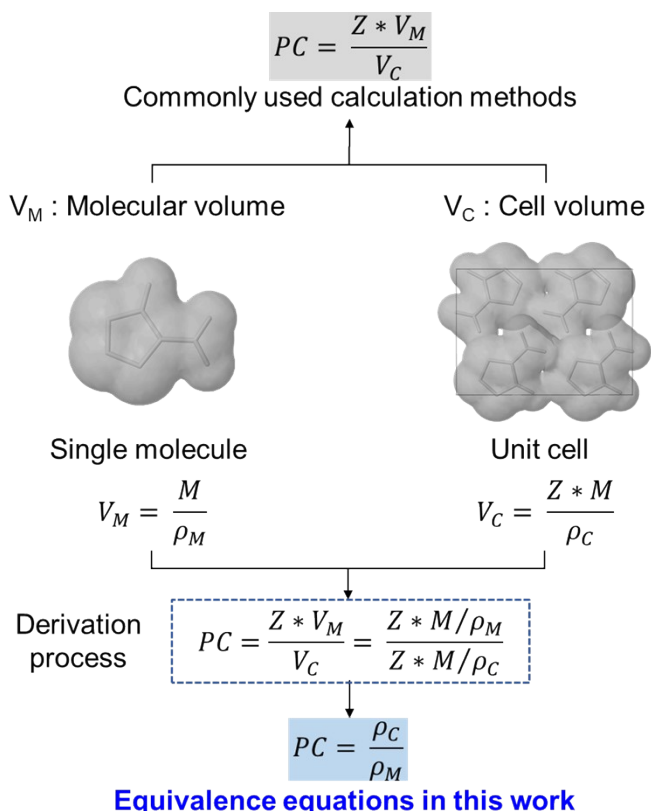

**Figure S4.** The optimized method on calculating packing coefficient.



**Table S3.** Density and packing coefficient of the compounds before and after the introduction of trinitromethyl group.

| Structure | $\rho_c$ (298 K) | $\rho_M$ | PC(%) | ref              |
|-----------|------------------|----------|-------|------------------|
|           | 1.900            | 2.334    | 81.41 | [2]              |
|           | 1.899            | 2.520    | 75.37 | <b>This work</b> |
|           | 1.867            | 2.488    | 75.03 | [3]              |
|           | 1.964            | 2.615    | 76.33 | [4]              |
|           | 1.780            | 2.354    | 76.13 | [5]              |
|           | 1.917            | 2.545    | 76.96 | [6]              |
|           | 1.881            | 2.545    | 73.94 | [7]              |
|           | 2.021            | 2.582    | 78.26 | [8]              |
|           | 1.770            | 2.386    | 74.20 | [9]              |

|                                                                                     |       |        |       |      |
|-------------------------------------------------------------------------------------|-------|--------|-------|------|
| 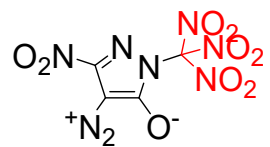   | 1.917 | 2.483  | 77.19 | [1]  |
|    | 1.787 | 2.347  | 76.13 | [5]  |
|    | 1.937 | 2.486  | 77.92 | [6]  |
|    | 1.661 | 2.151  | 76.36 | [10] |
|    | 1.882 | 2.437  | 77.23 | [11] |
|  | 1.499 | 2.178  | 68.83 | [10] |
|  | 1.793 | 2.403  | 74.62 | [6]  |
|  | 1.720 | 2.267  | 75.88 | [12] |
|  | 1.940 | 2.537  | 76.48 | [13] |
|  | 1.750 | 2.306  | 75.91 | [12] |
|  | 1.970 | 2.5081 | 78.55 | [14] |

|                                                                                     |       |       |       |      |
|-------------------------------------------------------------------------------------|-------|-------|-------|------|
| 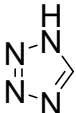   | 1.529 | 2.022 | 75.63 | [15] |
|    | 1.920 | 2.492 | 77.04 | [16] |
|    | 1.120 | -     | -     | [17] |
|    | 1.640 | -     | -     | [18] |
|    | 1.499 | -     | -     | [10] |
|  | 1.750 | -     | -     | [18] |
|  | 0.978 | -     | -     | [19] |
|  | 1.692 | -     | -     | [20] |
|  | 1.832 | -     | -     | [20] |

## 7. Heat of formation

The gas phase enthalpies of formation were calculated based on isodesmic reactions (Scheme S1). The enthalpy of reaction is obtained by combining the MP2/6-311++G\*\* energy difference for the reactions, the scaled zero point energies (ZPE), values of thermal correction ( $H_{\text{corr}}$ ), and other thermal factors. The heats of formation of other compounds in Scheme S2 were obtained from the NIST WebBook. The solid state heats of formation were calculated with Trouton's rule according to the following equation (T represents either the melting point or the decomposition temperature when no melting occurs prior to decomposition).

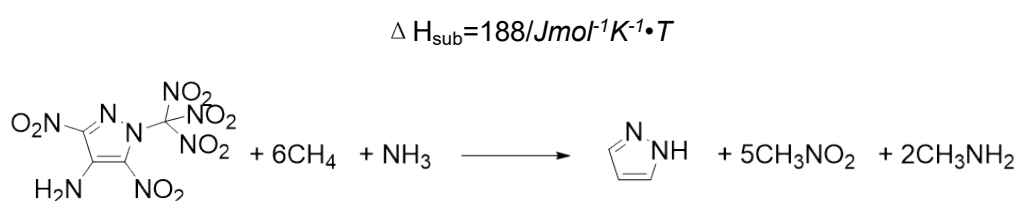

**Scheme S1.** Isodesmic reactions for calculating heats of formation for **DNTP**, respectively.

**Table S4.** Calculated Total Energy ( $E_0$ ), Zero Point Energy (ZPE), values of Thermal Correction ( $H_{\text{corr}}$ ) and gas phase heat of formation of the compounds.

| Compound                        | ZPE/a.u. | $H_{\text{corr}}$ /a.u. | $E_0$ /a.u.  | $\Delta H_f(\text{gas})$ (kJ mol <sup>-1</sup> ) |
|---------------------------------|----------|-------------------------|--------------|--------------------------------------------------|
| <b>TN-116</b>                   | 0.125906 | 0.145892                | -1340.512307 | 216.0926565                                      |
| CH <sub>4</sub>                 | 0.044793 | 0.048605                | -40.3796224  | -74.6                                            |
| NH <sub>3</sub>                 | 0.034372 | 0.03819                 | -56.4154644  | -45.9                                            |
| Pyrazole                        | 0.064026 | 0.068877                | -408.7261129 | 177.4                                            |
| CH <sub>3</sub> NH <sub>2</sub> | 0.064026 | 0.068401                | -95.5938452  | -22.9                                            |
| CH <sub>3</sub> NO <sub>2</sub> | 0.049856 | 0.055129                | -244.4784875 | -74.3                                            |

**Table S5.** Data of gas phase heat of formation and heat of sublimation for TN-116

| Compound      | $\Delta H_f(\text{gas})$ (kJ mol <sup>-1</sup> ) | $\Delta H_{\text{sub}}$ (kJ mol <sup>-1</sup> ) | $\Delta H_f(\text{solid})$ (kJ mol <sup>-1</sup> ) |
|---------------|--------------------------------------------------|-------------------------------------------------|----------------------------------------------------|
| <b>TN-116</b> | 216.0926565                                      | 72.5962                                         | 143.4964565                                        |

## 8. Noncovalent interaction

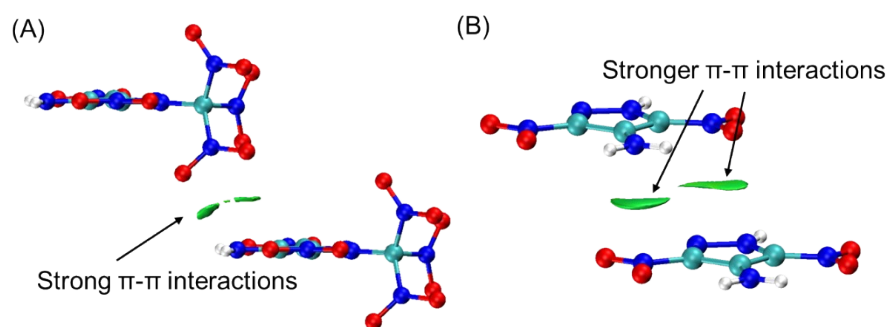

**Figure S5.** Noncovalent interaction of LLM-116 and TN-116.

## 9. Thermal stability

Differential scanning calorimetry (DSC/TG) showed that the decomposition temperature of **TN-116** is 112 °C.

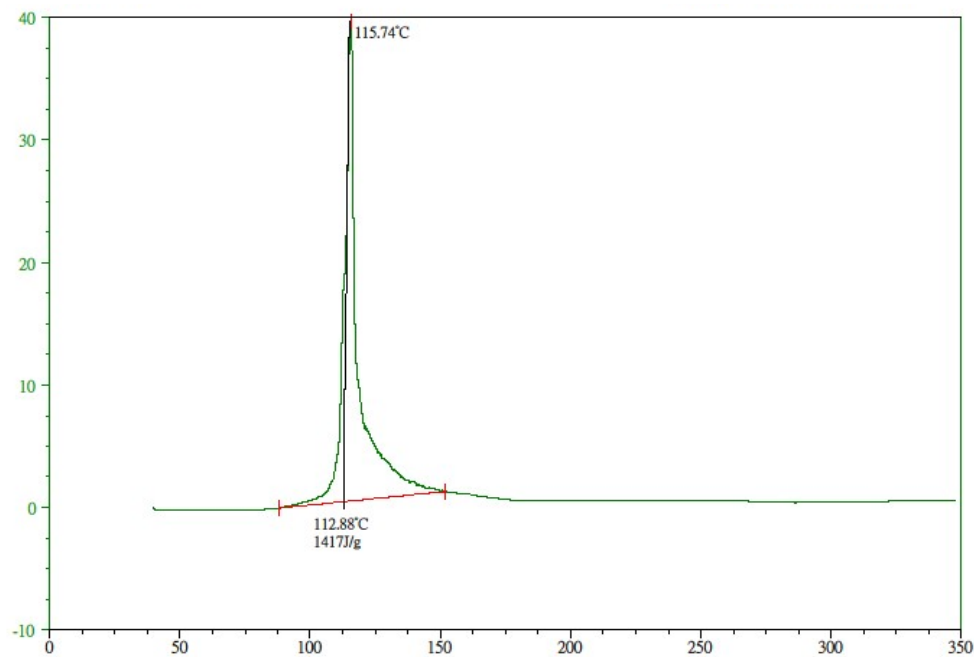

**Figure S6.** DSC plot for TN-116.

## REFERENCE

1. N. Ding, Q. Sun, C. Zhao, W. Zhang, S. Li and S. Pang, *Mater. Chem. Front.* 2022, **6**, 2670.

2. P. Yin, L. A. Mitchell, D. A. Parrish and J. M. Shreeve, *Angew. Chem., Int. Ed.*, 2016, **55**, 14409.
3. G. Herve, C. Roussel and H. Graindorge, *Angew. Chem., Int. Ed.*, 2010, **49**, 3177.
4. W. Zhang, Y. Yang, Y. Wang, T. Fei, Y. Wang, C. Sun and S. Pang, *Chem. Eng. J.* 2023, **451**, 138609.
5. K. Yu. Suponitsky, A. F. Smol'yakov, I. V. Ananyev, A. V. Khakhalev, A. A. Gidaspov and A. B. Sheremetev, *ChemistrySelect*, 2020, **5**, 14543.
6. I. L. Dalinger, I. A. Vatsadze, T. K. Shkineva, A. V. Kormanov, M. I. Struchkova, L. Y. Suponitsky, A. A. Bragin, K. A. Monogarov, V. P. Sinditskii and A. B. Sheremetev, *Chem.-Asian J.* 2015, **10**, 1987.
7. Y. Tang, C. He, G. H. Imler, D. A. Parrish and J. M. Shreeve, *J. Mater. Chem. A*, 2018, **6**, 5136.
8. I. L. Dalinger, K. Y. Suponitsky, T. K. Shkineva, D. B. Lempert and A. B. Sheremete, *J. Mater. Chem. A*, 2018, **6**, 14780.
9. Y. Du, J. Zhang, P. Peng, H. Su, S. Li and S. Pang, *New J. Chem.*, 2017, **41**, 9244.
10. Allen, F. H. *Acta Crystallogr., Sect. B: Struct. Sci.* **2002**, *58*, 380–388.
11. X. Yin, J. Li, G. Zhang, Z. Zhang, Q. Ma, J. Wang, S. Wang, *ChemPlusChem*. 2018, **83**, 787.
12. J. Zhang, Y. Feng, Y. Bo, R. J. Staples, J. Zhang and J. M. Shreeve, *J. Am. Chem. Soc.* 2021, **143**, 12665.
13. V. Thottempudi , H. Gao and J. M. Shreeve , *J. Am. Chem. Soc.*, 2011, **133** , 6464 —6471.
14. S. Dharavath, J. Zhang, G. H. Imler, D. A. Parrish and J. M. Shreeve, *J. Mater. Chem. A*, 2017, **5**, 4785.
15. R. Goddard, O. Heinemann and C. Krüger, *Acta Cryst.*, 1997, **C53**, 590.
16. Q. Yu, P. Yin, J. Zhang, C. He, G. H. Imler, D. A. Parrish and J. M. Shreeve, *J. Am. Chem. Soc.*, 2017, **139**, 8816.

17. P. Yin, Q. Zhang and J. M. Shreeve, *Acc. Chem. Res.*, 2016, **49**, 4.
18. Y. Zhang, Y. Li, J. Hu, Z. Ge, C. Sun and S. Pang, *Dalton Trans.*, 2019, **48**, 1524.
19. H. Kim, I. Hwang, S. Park and K. W. Lee, *J. Chem. Eng. Data*, 2010, **55**, 1266.
20. Y. Zhang, X. Sun, S. Yu, L. Bao, C. Sun and S. Pang, *Molecules*, 2017, **23**, 2.
